# Supplementary material
Source: MDPI journal article supplement (https://www.mdpi.com/2076-3263/14/4/95)
Supplement: s1 [file s1]

**Table S1.** Methodology for acquiring and processing images obtained by on-board sensors (July 20<sup>th</sup> 2022)

| Step        | Category    | Parameters                                             | Description               |
|-------------|-------------|--------------------------------------------------------|---------------------------|
| Acquisition | Hardware    | Drone                                                  | DJI Mavic 2 PRO           |
|             |             | Sensor                                                 | Caméra Hasselblad L1D-20c |
|             | Flight      | Mode                                                   | Stop at shooting point    |
|             |             | Height (m)                                             | 80                        |
|             |             | Y min N                                                | 56.667                    |
|             |             | Y max N                                                | 56.669                    |
|             |             | X min W                                                | 61.138                    |
|             |             | X max                                                  | 61.144                    |
|             |             | Area covered (ha)                                      | 4                         |
|             |             | Distance covered (m)                                   | 2 087                     |
|             |             | Recovery rate (%)                                      | 70                        |
|             |             | Number of images                                       | 74                        |
|             | Sensor      | Tilt (deg. of angle)                                   | 90                        |
|             |             | Focal length (mm)                                      | 10                        |
|             |             | Exposure time (s)                                      | 1/320                     |
|             |             | Sensitivity (ISO)                                      | 100                       |
|             | Images      | Format                                                 | JPEG                      |
|             |             | Width (px)                                             | 5 472                     |
|             |             | Height (px)                                            | 3 648                     |
|             |             | Resolution (dpi)                                       | 72                        |
|             |             | Width (cm)                                             | 193                       |
|             |             | Height (cm)                                            | 129                       |
| Treatment   | Application | Agisoft metashape Professionnal                        | V 1.8.3                   |
|             |             | Import images (nb)                                     | 74                        |
|             | Treatments  | Alignment (no. of images aligned)<br>no georeferencing | 74                        |
|             |             | Import landmarks (nb)                                  | 10                        |
|             |             | Marker placement on images                             | 10                        |
|             |             | EPSG points                                            | 32620                     |
|             |             | Point cloud construction (nb<br>points)                | 56 885 557                |
|             |             | MNE construction (cm/px)                               | 3.8                       |
|             |             | Orthomosaic construction (cm/px)                       | 1.9                       |
|             |             | MNE export (Mo)<br>EPSG 32620                          | 257                       |
|             |             | Ortho export (Mo)<br>EPSG 32620                        | 856                       |

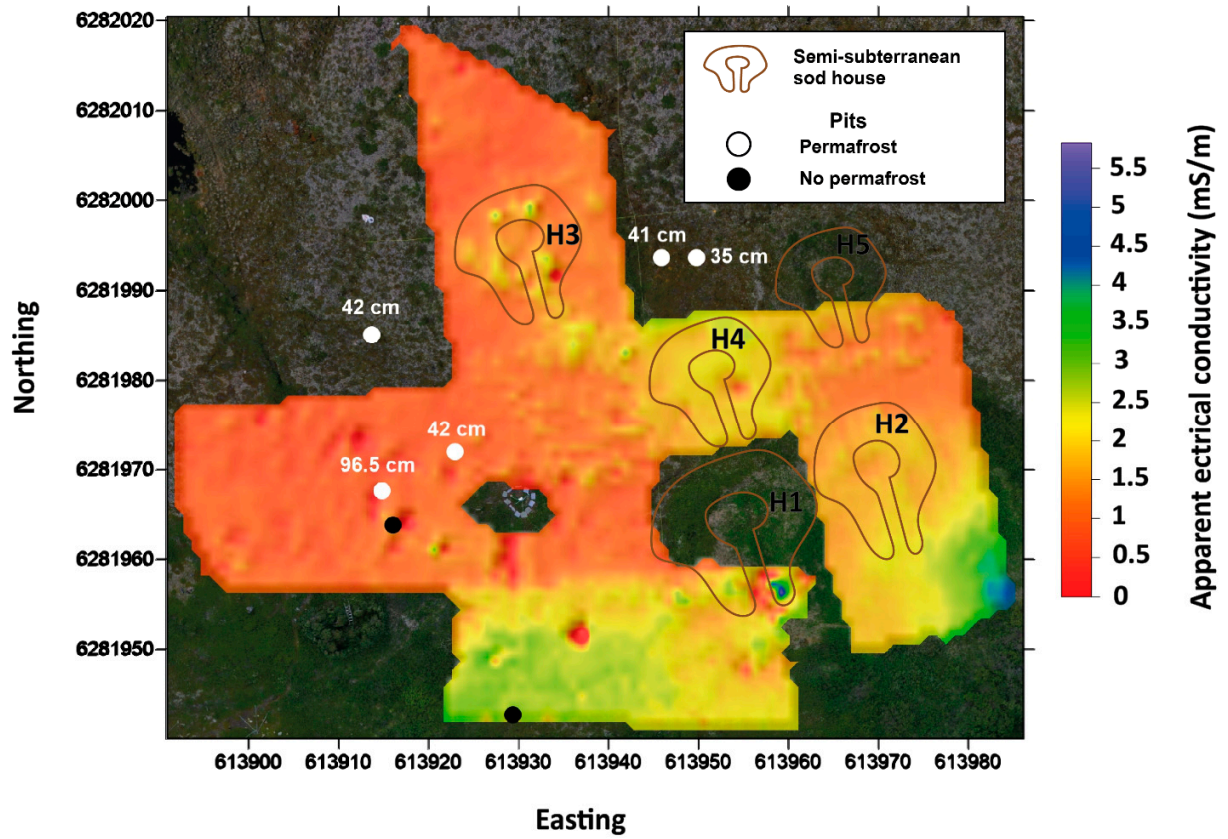

**Figure S1.** Map of apparent electrical conductivity at a depth of 1.1 m as measured by electromagnetic induction (EMI). Photogrammetric site image derived from 80-meter elevation drone surveys. The topography of the ground features is shown as an elevation shadow underneath the EM values. The depth (e.g. 42 cm) of the permafrost table as revealed by test pits is indicated. Houses H1 to H5 are identified.
